# Supplementary material for: Experimental evolution suggests rapid assembly of the ‘selfing syndrome’ from standing variation in Mimulus guttatus
Source: Frontiers journal article supplement (doi:10.3389/fpls.2024.1378568), 2024-08-27
Supplement: Data_Sheet_1.PDF [file Data_Sheet_1.PDF]

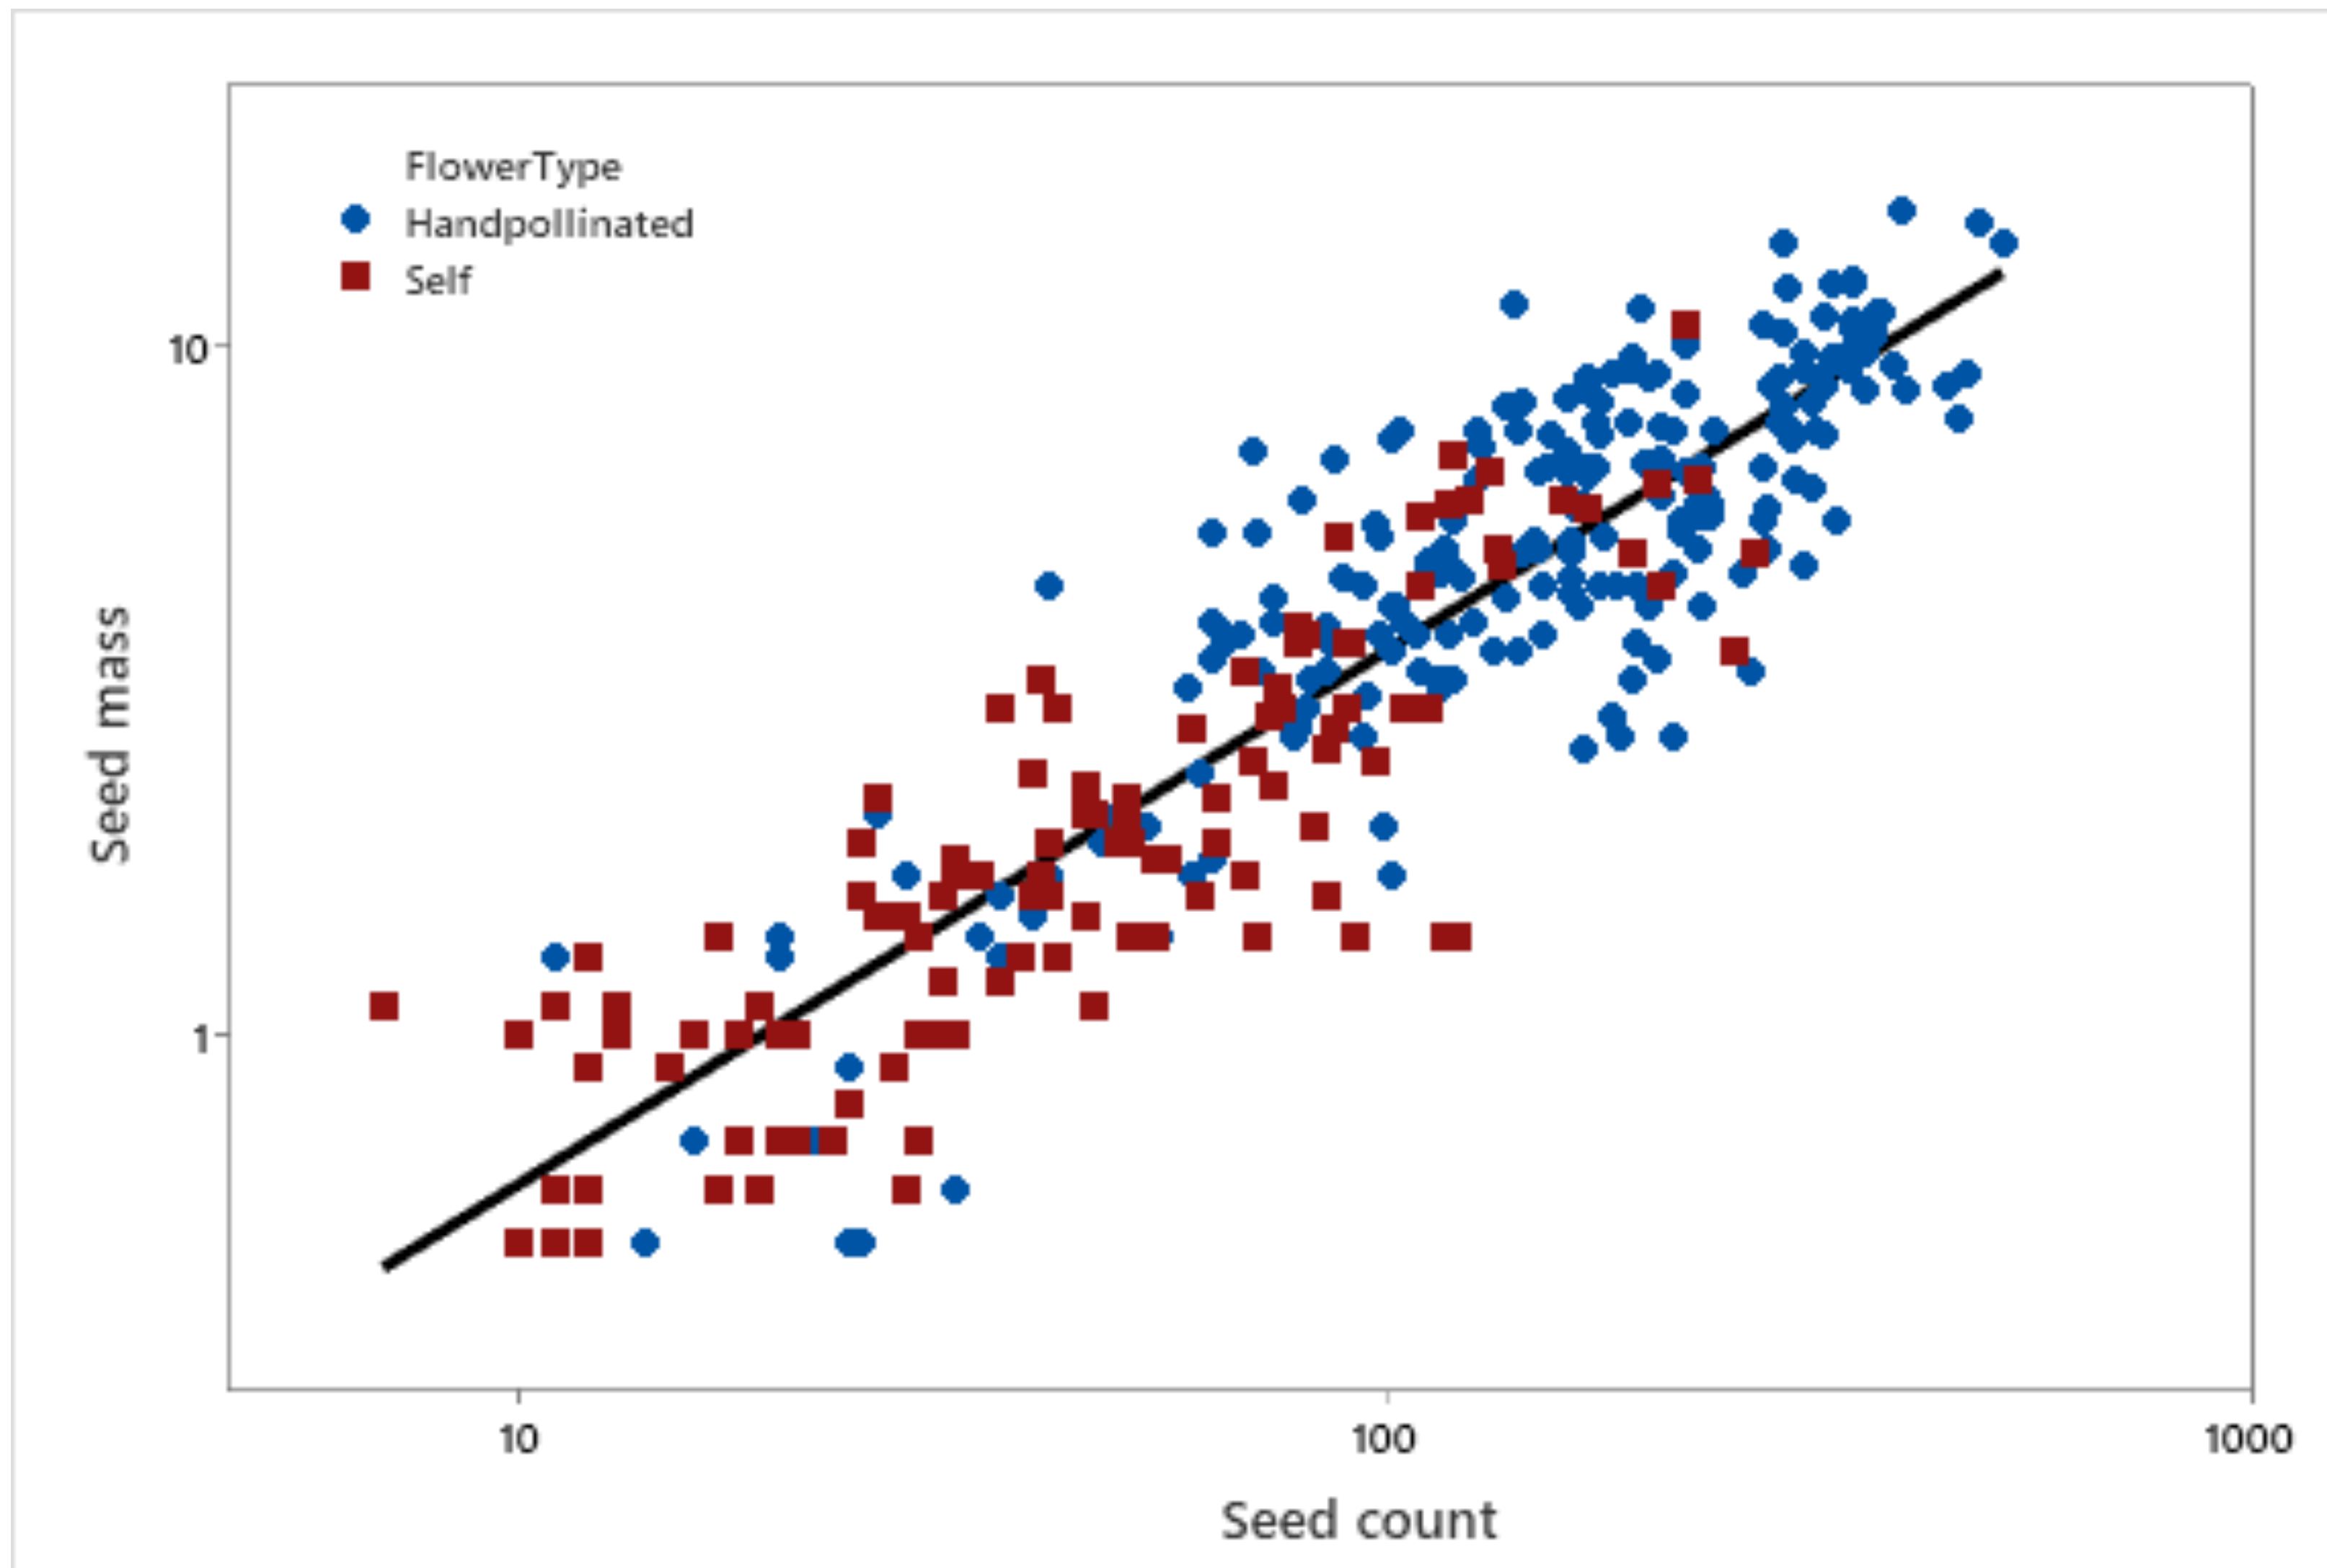

Supplemental Figure A. The allometric relationship between seed mass (in mg) and seed count.  $\text{Log}_{10}(\text{mass}) = -0.9915 + 0.7749 \text{ Log}_{10}(\text{count})$ . Since the slope  $< 1$ , individual seed mass declines as seed number per flower increases.  $n = 324$  (both types of flowers combined).
