# Supplementary material for: Experimental evolution suggests rapid assembly of the ‘selfing syndrome’ from standing variation in Mimulus guttatus
Source: Front Plant Sci. 2024 Aug 27;15:1378568. doi: 10.3389/fpls.2024.1378568 (PMC11388319; doi:10.3389/fpls.2024.1378568)
Supplement: Supplementary file 1 [file Table1.xlsx]

## Sheet: Sheet1
Supplemental Table A. The means and SD of each trait are reported for each trait for each population are reported for (i) generation 10 and (ii) generation 11, respectively. The ANOVA F statistic [degrees of freedom denominator] and significance level is reported for each trait, as well as all populations that differ from the Ancestor in a Tukey post hoc test.
(i) Generation 10
		Stigma anther separation				Day of flower				Leaf width				Corolla width				Anther length				Corolla length				Pistil length				Autogamy				Reproductive capacity					Flower size (PC1)			Stigma/anther exertion (PC2)				Prob of Self-seed
Treatment	Population	Mean	StDev	Divergence from ancestor	N	Mean	StDev	Divergence from ancestor	N	Mean	StDev	Divergence from ancestor	N	Mean	StDev	Divergence from ancestor	N	Mean	StDev	Divergence from ancestor	N	Mean	StDev	Divergence from ancestor	N	Mean	StDev	Divergence from ancestor	N	Mean	StDev	Divergence from ancestor	N	Mean	StDev	Divergence from ancestor	N	Mean	StDev	Divergence from ancestor	N	Mean	StDev	Divergence from ancestor	N	Mean	StDev	Divergence from ancestor	N
Ancestor	0	9.22115	3.50798		208	29.6364	4.50019		209	91.933	25.6199		209	70.3647	10.5778		207	46.5192	4.34693		208	85.6971	9.99769		208	55.689	5.17194		209	0.622585	0.720241		190	0.789031	0.236314		190	1.25697	1.60872		206	-0.303987	0.577813		206	0.5	0.501321		190
Selfing	1	5.59836	3.19351	*	61	30.3934	3.40724		61	80.3279	17.4802	*	61	63.0656	8.36734	*	61	44.377	2.43183	*	61	79.3983	5.91956	*	59	49.9754	4.11038	*	61	1.1436	0.690143	*	55	0.707641	0.266273		52	-0.077812	1.02423	*	59	-0.378443	0.551336		59	0.818182	0.389249	*	55
Mixed mating	2	6.86508	3.63141	*	63	28.4127	3.26583		63	73.9683	16.2917	*	63	61.7619	10.2524	*	63	41.3889	3.68568	*	63	76.3651	8.55071	*	63	48.254	4.40937	*	63	0.920653	0.750903		58	0.670129	0.300912		53	-0.744861	1.38831	*	63	-0.653945	0.5218	*	63	0.689655	0.466675		58
Selfing	3	6.71698	3.18879	*	53	28.9623	3.21033		53	77.0943	18.0419	*	53	50.9615	9.86221	*	52	41.5755	4.62892	*	53	73.0472	10.6659	*	53	48.2925	5.26822	*	53	0.599763	0.640174		47	0.60107	0.261051	*	47	-1.32179	1.71772	*	52	0.120757	0.481229		52	0.553191	0.502538		47
Mixed mating	4	7.57759	3.49285		58	27.5	3.21319	*	58	76.1034	16.8416	*	58	58.4914	10.0536	*	58	48.2931	5.80988		58	83.6552	10.5224		58	55.8707	5.90611		58	0.702589	0.744831		53	0.691228	0.249914		51	0.839654	1.80939		58	0.653103	0.729255	*	58	0.528302	0.503975		53
Outcrossing	5	11.2797	3.45572	*	59	25.6833	2.98863	*	60	72.7833	17.5722	*	60	68.6917	9.87768		60	45.9915	4.14551		59	83.4915	8.34777		59	57.1	5.44526		60	0.988375	0.799936		55	0.870477	0.283458		57	1.14325	1.48296		59	-0.0735349	0.622397		59	0.690909	0.466378		55
Mixed mating	6	5.79245	3.89086	*	53	26.9259	3.45238	*	54	76.0556	19.8022	*	54	64.4259	8.6996	*	54	46.2222	5.34619		54	82.4074	10.4023		54	52.1321	5.33958	*	53	0.807801	0.692244		51	0.737725	0.234467		51	0.508891	1.54179		53	-0.189005	0.819865		53	0.666667	0.476095		51
Selfing	7	7.775	3.91047		60	26.9032	2.28114	*	62	65.9344	15.5851	*	61	59.9918	11.7971	*	61	43.9	4.54152	*	60	76.918	10.3502	*	61	51.4435	6.30515	*	62	0.885287	0.658762		57	0.517264	0.282003	*	54	-0.269084	1.74772	*	60	-0.0174331	0.679575		60	0.736842	0.444262		57
Mixed mating	8	9.33333	4.52013		57	26.614	2.37362	*	57	66.9123	14.9801	*	57	60.4825	10.4313	*	57	45.6754	5.04311		57	80.3304	10.534	*	56	55.0088	5.39882		57	0.803064	0.735718		52	0.791461	0.205771		57	0.411427	1.69294	*	56	0.303529	0.648403	*	56	0.634615	0.486236		52
Outcrossing	9	8.34821	3.77181		56	24.5965	2.29798	*	57	64.1053	14.0924	*	57	67.5357	9.11086		56	47.1754	4.14631		57	82.5614	8.21533		57	55.5625	5.05071		56	0.796708	0.78185		51	0.829225	0.22232		53	1.02275	1.43856		55	-0.0353523	0.587217		55	0.607843	0.493089		51
Mixed mating	10	7.08333	3.95865	*	60	27.0328	2.63291	*	61	74.2295	16.5996	*	61	63.7241	8.63295	*	58	43.8167	4.06824	*	60	80.3	7.69008	*	60	50.8361	4.72733	*	61	0.765096	0.70864		56	0.709555	0.243384		59	-0.00682135	1.29278	*	57	-0.39811	0.646083		57	0.625	0.488504		56
Selfing	11	6.31373	3.17169	*	51	29.549	3.18944		51	83.8235	21.9743		51	58.39	8.20608	*	50	45.4706	4.22186		51	76.7549	8.2531	*	51	51.7843	5.19447	*	51	0.956638	0.587577		43	0.547565	0.244754	*	45	-0.145586	1.47866	*	50	0.201571	0.468712		50	0.860465	0.350605	*	43
Mixed mating	12	7.83898	3.58089		59	26.9667	2.92833	*	60	72.9167	20.6219	*	60	63.3158	8.90858	*	57	48.0254	4.29055		59	86.1525	10.4032		59	55.6833	5.26418		60	0.678599	0.637881		57	0.602905	0.331114	*	56	1.11541	1.43521		57	0.273456	0.745786	*	57	0.631579	0.486664		57
Mixed mating	13	8.11017	2.99578		59	27.55	4.38188	*	60	78.0339	19.9214	*	59	61.5	10.727	*	60	44.825	4.41475	*	60	79.822	10.9496	*	59	53.0847	5.36283	*	59	0.437795	0.612332		48	0.659069	0.289928		53	0.260838	1.64744	*	58	0.00115598	0.629704		58	0.4375	0.501328	*	48
Selfing	14	7.00806	2.88082	*	62	29.1905	2.98846		63	100.177	22.651		62	70.3968	9.09456		63	43.8413	3.6321	*	63	82.0159	8.52414		63	50.75	4.05975	*	62	0.786743	0.650934		53	0.795178	0.250674		50	0.339147	1.31519	*	62	-0.887156	0.540208	*	62	0.660377	0.478113		53
Selfing	15	7.69167	3.81688		60	28.5	2.85527		60	68.8475	16.3558	*	59	51.8083	8.36259	*	60	41.375	4.70901	*	60	73.4417	9.10396	*	60	49.0667	4.71247	*	60	0.994927	0.739289		52	0.531942	0.202573	*	54	-1.23429	1.46966	*	60	0.1017	0.517388		60	0.730769	0.447888		52
Mixed mating	16	9.05932	4.97934		59	27.1186	3.30665	*	59	75.8621	18.9046	*	58	66.9153	12.2024		59	44.2288	4.51942	*	59	85	10.6159		59	53.2881	6.82933	*	59	0.811479	0.755455		52	0.772556	0.288299		49	0.617779	1.78157		59	-0.470025	0.802778		59	0.634615	0.486236		52
Outcrossing	17	11.2193	2.85516	*	57	24.5614	2.77114	*	57	66.0351	16.0078	*	57	68.5965	7.12856		57	44.886	2.99556	*	57	82.0263	6.22023		57	56.1053	3.5866		57	0.541131	0.641352		50	0.733604	0.255681		54	0.84128	0.980779		57	-0.214296	0.470949		57	0.48	0.504672	*	50
Selfing	18	4.50806	3.39176	*	62	28.8033	3.56754		61	72.5	12.8965	*	62	62.3065	8.14236	*	62	43.1613	5.02353	*	62	77.8468	7.98543	*	62	47.6694	4.53036	*	62	0.665707	0.60894		58	0.718143	0.192429		58	-0.514286	1.34803	*	62	-0.621656	0.749095		62	0.637931	0.484796		58
Selfing	19	7.40833	3.31086		60	28.2167	3.21064		60	63.1333	18.7847	*	60	61.2712	8.84996	*	59	42.2583	4.86207	*	60	77.4083	8.77472	*	60	49.6667	5.77815	*	60	0.80633	0.758927		35	0.567557	0.277601	*	52	-0.499586	1.58746	*	59	-0.444781	0.684513		59	0.6	0.49705		35
Outcrossing	20	9.13636	4.68296		55	24.1273	2.2199	*	55	64.2364	11.3349	*	55	64.1909	6.66701	*	55	46.0909	3.96173		55	82.8091	6.81263		55	55.2273	3.78327		55	0.447931	0.563907		51	0.680652	0.25726		50	0.750163	1.01864		55	0.0707686	0.527031		55	0.490196	0.504878	*	51
	Summarized Stats	F[1371] = 13.56 , P < 0.000				F[1380] = 18.32 , P < 0.000				F[1376] = 19.54 , P < 0.000				F[1368] = 21.08 , P < 0.000				F[1375] = 13.94 , P < 0.000				F[1372] = 11.88 , P < 0.000				F[1377] = 23.19 , P < 0.000				F[1223] = 3.78 , P < 0.000				F[1244] = 9.03 , P < 0.000				F[1356] = 18.23 , P < 0.000				F[1356] = 21.23, P < 0.000				F[1223] = 2.99 , P < 0.000
	Legend
	O refers to ancestor population
	1-20 refers to experiemental population
	* indicates means that are significantly different from ancestor
(ii) Generation 11
		Stigma anther separation				Day of flower				Leaf width				Corolla width				Anther length				Corolla length				Pistil length				Autogamy				Reproductive capacity					Flower size (PC1)			Stigma/anther exertion (PC2)				Prob of Self-seed
Treatment	Population	Mean	StDev	Divergence from ancestor	N	Mean	StDev	Divergence from ancestor	N	Mean	StDev	Divergence from ancestor	N	Mean	StDev	Divergence from ancestor	N	Mean	StDev		N	Mean	StDev	Divergence from ancestor	N	Mean	StDev	Divergence from ancestor	N	Mean	StDev	Divergence from ancestor	N	Mean	StDev	Divergence from ancestor	N	Mean	StDev	Divergence from ancestor	N	Mean	StDev	Divergence from ancestor	N	Mean	StDev	Divergence from ancestor	N
Ancestor	0	10.164	3.75952		439	29.553	5.21647		443	62.8375	29.6891		443	56.7336	11.729		443	42.5056	4.91183		443	75.0792	11.2294		442	52.6925	6.13341		439	0.605547	0.663656		431	0.696206	0.273519		437	-0.508932	1.85741		438	0.16254	0.652647		438	22.9739	29.4044		230
Selfing	1	7.65385	2.67334	*	39	33.4103	5.71571	*	39	85.9744	29.6484	*	39	63.3846	9.64806	*	39	44.5128	4.15567		39	80.9744	8.67615		39	52.1667	4.43867		39	1.08902	0.635206	*	39	0.581023	0.330149		41	0.204799	1.47121		39	-0.242957	0.536285	*	39	29.697	28.4775		33
Mixed mating	2	9.30435	3.30904		46	32	4.93876		47	67.1702	19.1814		47	62.4894	9.49742		47	42.1304	4.03517		46	77.2447	8.29738		47	51.2979	4.41423		47	1.17526	0.693207	*	47	0.827908	0.215523		47	-0.303915	1.35228		46	-0.399171	0.610662	*	46	41.6923	38.5358		39
Selfing	3	9.11667	3.43331		30	31.9	4.49022		30	70.7667	21.7028		30	49.55	9.84654		30	41.7	3.95361		30	73.1667	9.64842		30	50.8167	5.74529	*	30	1.11459	0.628799	*	30	0.633522	0.29272		29	-1.16041	1.67642		30	0.430662	0.387605		30	31.92	32.8074		25
Mixed mating	4	9.13333	2.81601		30	28.6333	4.61245		30	57.2	19.8362		30	54.9333	10.6121		30	47.75	6.42295	*	30	80.7167	12.1248		30	56.8833	7.04381		30	1.05661	0.707678		27	0.828798	0.245495		28	0.574449	2.17655		30	0.979552	0.600791	*	30	35.9048	35.1723		21
Outcrossing	5	11.6944	3.76104		54	26.4259	4.55823	*	54	45.4815	26.5655	*	54	56.6481	12.6307		54	41.75	5.34979		54	73.75	12.7048		54	53.4444	6.75632		54	0.618442	0.662289		52	0.775602	0.196198		55	-0.613498	2.14761		54	0.207374	0.525685		54	22.069	25.8442		29
Mixed mating	6	7.45833	2.52806	*	36	28.9167	5.005		36	63.1667	28.5582		36	54.7361	8.36787		36	43.8889	5.39459		36	75.6806	10.0436		36	51.3472	5.29261		36	1.00365	0.672447		35	0.683063	0.245084		36	-0.550522	1.70582		36	0.282851	0.597387		36	30.4643	35.152		28
Selfing	7	9.13265	3.26244		49	28.0612	5.49397		49	59.9796	32.449		49	54.5306	10.6147		49	43.7551	5.5143		49	74.4592	10.5262		49	52.8878	6.04434		49	1.14239	0.758908	*	48	0.718514	0.238815		49	-0.504906	1.87301		49	0.444554	0.541951		49	49.5526	56.245	*	38
Mixed mating	8	9.29487	2.99059		39	29.359	5.11699		39	64.9744	29.5274		39	56.9872	10.3673		39	46.1154	5.51846	*	39	78.6974	12.2725		38	55.4103	6.08911		39	1.12379	0.727349	*	38	0.858187	0.21905	*	39	0.300945	2.02973		38	0.631657	0.417748	*	38	44.3548	53.2231		31
Outcrossing	9	9.20732	3.7881		41	25.122	4.32548	*	41	39.3659	18.0233	*	41	56.3293	9.81173		41	44.2927	4.21007		41	74.8659	9.43532		41	53.5	4.93584		41	0.657641	0.636905		41	0.74382	0.170537		41	-0.303692	1.51552		41	0.42179	0.559643		41	17.88	17.2562		25
Mixed mating	10	9.80612	3.90755		49	28.5102	4.078		49	60.1837	23.6023		49	56.6224	10.8275		49	42.602	4.08501		49	76.9796	9.98121		49	52.4082	6.19868		49	0.924339	0.72739		48	0.756453	0.219446		49	-0.450981	1.74538		49	0.124647	0.483733		49	33.2647	33.4023		34
Selfing	11	8.61111	2.44687		27	35.2222	3.30888	*	27	79.0714	18.6129		28	58.6429	7.96736		28	45.0357	3.27711		28	77.3393	6.97755		28	53.7037	3.30576		27	1.02423	0.441016		28	0.699745	0.147828		28	-0.0271609	1.11221		27	0.357554	0.462983		27	14.8462	8.37946		26
Mixed mating	12	9.78571	3.2473		28	27.8966	4.33709		29	69.0714	26.6499		28	60.1786	9.25184		28	46.2321	5.54524	*	28	83.5357	12.1928	*	28	56.0179	5.95272		28	0.937323	0.761127		27	0.838911	0.260879		28	0.70296	1.93732		28	0.39065	0.450378		28	39.0526	43.5373		19
Mixed mating	13	10.8421	2.75118		38	26.3947	3.28419	*	38	66.3158	22.618		38	58.4079	9.83571		38	44.3289	4.6474		38	77.8421	10.2819		38	55.1711	4.66337		38	1.01474	0.769738		37	0.746344	0.2458		38	0.0758986	1.61706		38	0.382066	0.572316		38	42.7037	40.2462		27
Selfing	14	8.7875	2.81909		40	31.275	4.41436		40	97.9	27.4981	*	40	70.2375	11.025	*	40	44.25	3.67423		40	82.9875	10.1112	*	40	53.0375	4.70731		40	1.23722	0.641157	*	39	0.942556	0.201204	*	39	0.633893	1.61054	*	40	-0.659881	0.528698	*	40	41.4848	40.9948		33
Selfing	15	9.52778	2.49269		36	33.1667	4.89022	*	36	74.75	30.4756		36	48.6944	8.57095	*	36	42.3472	3.32913		36	72.9028	7.7633		36	51.875	4.13068		36	1.35954	0.697877	*	35	0.666677	0.283216		35	-1.05326	1.29395		36	0.636873	0.420568	*	36	56.7	52.0783	*	30
Mixed mating	16	10.0714	3.71643		42	29.0244	5.25589		41	56.1707	21.2166		41	61.0357	12.8975		42	42.869	5.23131		42	79	10.7249		42	52.9405	6.19323		42	1.1756	0.840461	*	43	0.754893	0.241507		43	-0.0955874	1.96664		42	-0.124405	0.55664		42	67.9677	63.5518	*	31
Outcrossing	17	11.6786	2.86446		42	25.5116	3.74402	*	43	43.4884	17.0285	*	43	56.0698	9.2849		43	42.6395	3.65038		43	73.2674	7.6969		43	54.381	5.05917		42	0.544882	0.653111		39	0.737965	0.165911		40	-0.46959	1.36233		42	0.399006	0.606531		42	21.8	26.9631		20
Selfing	18	7.78	2.33684	*	50	29.8627	4.07931		51	65.5294	24.0669		51	59.9	10.3589		50	42.89	3.4542		50	75.1	8.32442		50	50.67	3.72061		50	1.12734	0.609518	*	51	0.710047	0.241532		50	-0.527491	1.31808		50	-0.17386	0.654635	*	50	30.2	30.7635		45
Selfing	19	9.63415	3.21913		41	28.9512	4.24824		41	65.0732	28.8309		41	59.2805	9.46906		41	42.8415	4.66696		41	78.3049	8.70192		41	52.4756	4.90274		41	1.6004	0.665917	*	42	0.753496	0.18793		41	-0.244636	1.57288		41	-0.0432597	0.488341		41	83.575	71.1214	*	40
Outcrossing	20	10.5568	3.51114		44	27.5	4.44344		44	45.5	25.9736	*	44	53.4205	11.3352		44	42.6364	4.8911		44	74.0341	12.6079		44	53.1932	5.19863		44	0.420052	0.580059		44	0.643833	0.273447		44	-0.661546	1.87566		44	0.456778	0.567642		44	16.2778	21.9647		18
	Summarized Stats	F[1239] = 5.28 , P < 0.000				F[1246] = 11.46 , P < 0.000				F[1246] = 11.03 , P < 0.000				F[1246] = 7.24 , P < 0.000				F[1245] = 4.65 , P < 0.000				F[1244] = 3.71 , P < 0.000				F[1240] = 3.14 , P < 0.000				F[1220] = 11.95 , P < 0.000				F[1236] = 4.80 , P < 0.000				F[1237] = 3.21 , P < 0.000				F[1237] = 16.91 , P < 0.000				F[821] = 7.43 , P < 0.000
	Legend
	O refers to ancestor population
	1-20 refers to experiemental population
	* indicates means that are significantly different from ancestor
[truncated: 4 more columns]
