# Supplementary material for: Experimental evolution suggests rapid assembly of the ‘selfing syndrome’ from standing variation in Mimulus guttatus
Source: Front Plant Sci. 2024 Aug 27;15:1378568. doi: 10.3389/fpls.2024.1378568 (PMC11388319; doi:10.3389/fpls.2024.1378568)
Supplement: Supplementary file 2 [file Table2.xlsx]

## Sheet: Sheet1
TABLE B. The correlations between measured traits are reported within (i) generation 10 and (ii) generation 11.
	(i) generation 10
		Day of Flower	Leaf width	Corolla width	Anther length	Corrolla length	Pistil length	Stigma anther separation	Autogamy	Reproductive capacity	PC1(Flower size)	PC2 (stigma/anther exertion
	Leaf width	0.323
	Corolla width	0.053	0.439
	Anther length	0.047	0.302	0.482
	Corrolla length	0.113	0.441	0.721	0.739
	Pistisl length	-0.102	0.223	0.507	0.735	0.688
	Stigma anther separation	-0.205	-0.026	0.176	-0.118	0.127	0.587
	Autogamy	0.067	0.103	0.062	0.102	0.065	0.007	-0.115
	Reproductive capacity	-0.05	0.172	0.259	0.169	0.249	0.176	0.049	0.09
	PC1 (flower size)	0.034	0.406	0.777	0.869	0.918	0.863	0.225	0.067	0.247
	PC2 (stigma/anther exertion)	-0.12	-0.181	-0.472	0.436	-0.025	0.462	0.155	-0.016	-0.088	0.139
	Prob of Self-seed	0.046	0.107	0.056	0.105	0.047	-0.002	-0.131	0.831	0.048	0.056	-0.012
	Log10(Self-seed >0)	0.069	0.032	0.034	0.03	0.057	0.016	-0.013	0.997	0.11	0.043	-0.016
	(ii) generation 11
		Day of Flower	Leaf width	Corolla width	Anther length	Corrolla length	Pistil length	Stigma anther separation	Autogamy	Reproductive capacity	PC1(Flower size)	PC2 (stigma/anther exertion
	Leaf width	0.634
	Corolla width	0.317	0.613
	Anther length	0.246	0.487	0.608
	Corrolla length	0.366	0.644	0.815	0.804
	Pistisl length	0.189	0.449	0.621	0.799	0.769
	Stigma anther separation	-0.037	0.042	0.148	-0.121	0.11	0.501
	Autogamy	0.08	0.171	0.119	0.177	0.145	0.066	-0.149
	Reproductive capacity	0.056	0.308	0.365	0.327	0.356	0.339	0.088	0.188
	PC1 (flower size)	0.314	0.613	0.846	0.899	0.949	0.887	0.17	0.141	0.388
	PC2 (stigma/anther exertion)	-0.163	-0.232	-0.502	0.295	-0.13	0.321	0.105	-0.014	-0.057	-0.002
	Prob of Self-seed	0.083	0.13	0.08	0.138	0.107	0.059	-0.102	0.8	0.142	0.108	0.009
	Log10(Self-seed >0)	0.024	0.123	0.101	0.126	0.11	0.029	-0.136	0.998	0.144	0.1	-0.042
