# Supplementary material for: Experimental evolution suggests rapid assembly of the ‘selfing syndrome’ from standing variation in Mimulus guttatus
Source: Front Plant Sci. 2024 Aug 27;15:1378568. doi: 10.3389/fpls.2024.1378568 (PMC11388319; doi:10.3389/fpls.2024.1378568)
Supplement: Supplementary file 4 [file Table4.xlsx]

## Sheet: Sheet1
TABLE D. The nested Analysis of Variance (population within treatment) is reported for each trait, Generation 11 then Generation 10. Cohort was included as random factor.
		Stigma anther separation generation 11					Stigma anther separation generation 10					Day of flower generation 11					Day of flower generation 10					Leaf width generation 11					Leaf width generation 10				Reproductive capacity generation 11					Reproductive capacity generation 10					Flowersize(PC1) gen 10					Flowersize(PC1) gen 11
	Source	DF	Adj SS	Adj MS	F-Value	P-Value	DF	Adj SS	Adj MS	F-Value	P-Value	DF	Adj SS	Adj MS	F-Value	P-Value	DF	Adj SS	Adj MS	F-Value	P-Value	DF	Adj SS	Adj MS	F-Value	P-Value	DF	Adj SS	F-Value	P-Value	DF	Adj SS	Adj MS	F-Value	P-Value	DF	Adj SS	Adj MS	F-Value	P-Value	DF	Adj SS	Adj MS	F-Value	P-Value	DF	Adj SS	Adj MS	F-Value
	Treatment	2	456.64	228.318	6.45	0.008	2	1723.2	861.62	10.23	0.001	2	3269.1	1634.56	11.25	0.001	2	2526	1263	32.98	0	2	107716	53858.1	17.74	0	2	14095	1.76	0.201	2	0.9445	0.47225	1.84	0.189	2	3.6676	1.8338	4.77	0.023	2	338.9	169.452	10.52	0.001	2	42.16	21.081	2.58
	Population (Treatment)	17	596.18	35.07	3.51	0	17	1443.2	84.89	6.35	0	17	2441.3	143.6	6.85	0	17	655.5	38.56	4.4	0	17	51035	3002.1	5.37	0	17	68452	13.92	0	17	4.4206	0.26004	4.92	0	17	6.5381	0.38459	5.81	0	17	275.55	16.209	7.65	0	17	137.72	8.101	3.12
	Cohort	1	45.2	45.203	4.53	0.034	1	158.8	158.84	11.88	0.001	1	22.9	22.86	1.09	0.297	1	789.8	789.8	90.19	0	1	57729	57729.5	103.23	0	1	21610	74.71	0	1	1.4744	1.47439	27.87	0	1	0.5886	0.58864	8.89	0.003	1	79.76	79.757	37.66	0	1	223.39	223.387	85.92
	Error	780	7784.71	9.98			1143	15288.4	13.38			783	16414.7	20.96			1151	10080	8.76			783	437879	559.2			1147	331756			779	41.2037	0.05289			1033	68.3867	0.0662			1130	2393.17	2.118			779	2025.3	2.6
	For legend: Gen 11 here only contains the outbred plants
	Analysis on floral dimensions
		Corolla width generation 11					Corolla width generation 10					Anther length generation 11					Anther length generation 10					Corolla length generation 11					Corolla length generation 10					Pistil length generation 11					Pistil length generation 10
	Source	DF	Adj SS	Adj MS	F-Value	P-Value	DF	Adj SS	Adj MS	F-Value	P-Value	DF	Adj SS	Adj MS	F-Value	P-Value	DF	Adj SS	Adj MS	F-Value	P-Value	DF	Adj SS	Adj MS	F-Value	P-Value	DF	Adj SS	Adj MS	F-Value	P-Value	DF	Adj SS	Adj MS	F-Value	P-Value	DF	Adj SS	Adj MS	F-Value	P-Value
	Treatment	2	853	426.7	0.46	0.641	2	8732	4366.15	3.82	0.043	2	372.7	186.34	2.28	0.133	2	1562.7	781.35	4.24	0.032	2	2628	1314.09	4.55	0.026	2	6991	3495.55	7.47	0.005	2	550.3	275.17	3.2	0.066	2	6217.8	3108.92	13.75	0
	Population (Treatment)	17	15683	922.5	9.96	0	17	19588	1152.25	13.62	0	17	1373	80.76	3.96	0	17	3160.4	185.91	9.81	0	17	4864	286.14	3.16	0	17	8012	471.28	6.19	0	17	1450.8	85.34	3.15	0	17	3875.2	227.95	8.71	0
	Cohort	1	10807	10806.9	116.62	0	1	4171	4170.92	49.29	0	1	770.1	770.1	37.8	0	1	304.1	304.13	16.06	0	1	9378	9378.41	103.69	0	1	6940	6940.25	91.15	0	1	1179.8	1179.83	43.52	0	1	17.6	17.63	0.67	0.412
	Error	783	72560	92.7			1141	96549	84.62			782	15930.7	20.37			1147	21727	18.94			782	70732	90.45			1144	87102	76.14			781	21173.2	27.11			1148	30054.2	26.18
[truncated: 31 more columns]
