# Supplementary material for: Experimental evolution suggests rapid assembly of the ‘selfing syndrome’ from standing variation in Mimulus guttatus
Source: Front Plant Sci. 2024 Aug 27;15:1378568. doi: 10.3389/fpls.2024.1378568 (PMC11388319; doi:10.3389/fpls.2024.1378568)
Supplement: Supplementary file 5 [file Table5.xlsx]

## Sheet: Sheet1
TABLE E. The variance within and among populations (within treatments) is reported for each trait.
			Day of Flower				Stigma anther separation				Reproductive capacity				Flower size				Prob of Self-seed				Log10(Self-seed >0 )
	Gen 10		Ancestor	Outcrossing	Mixed mating	Selfing	Ancestor	Outcrossing	Mixed mating	Selfing	Ancestor	Outcrossing	Mixed mating	Selfing	Ancestor	Outcrossing	Mixed mating	Selfing	Ancestor	Outcrossing	Mixed mating	Selfing	Ancestor	Outcrossing	Mixed mating	Selfing
		Variance within populations	20.252	6.705	10.52	9.676	12.306	14.06	15.4	11.382	0.0558	0.06532	0.07329	0.06204	2.588	1.567	2.508	2.183	0.2513	0.24255	0.23725	0.2045	0.3199	0.3212	0.3088	0.2645
		Variance among poulation	*	0.439	0.308	1.043	*	2.2	1.348	1.266	*	0.0075	0.0039	0.0107	*	0.0313	0.322	0.324	*	0.0102	0.0068	0.0113	*	0.065	0.0188	0.0227
	Gen 11	Variance within populations	30.498	18.31	21.34	21.51	12.204	12.26	10.18	8.194	0.0414	0.0425	0.05624	0.061	3.199	3.071	3.36	2.275	0.253	0.2498	0.18488	0.1158	0.489	0.2997	0.0149	0.2588
		Variance among poulation	*	1.121	2.473	5.927	*	1.389	0.954	0.546	*	0.0032	0.0037	0.0115	*	0.0259	0.217	0.371	*	0.0073	0.0026	0.0027	*	0.0015	0.0026	0.0385
