# Supplementary material for: Experimental evolution suggests rapid assembly of the ‘selfing syndrome’ from standing variation in Mimulus guttatus
Source: Front Plant Sci. 2024 Aug 27;15:1378568. doi: 10.3389/fpls.2024.1378568 (PMC11388319; doi:10.3389/fpls.2024.1378568)
Supplement: Supplementary file 6 [file Table6.xlsx]

## Sheet: Sheet1
TABLE F. The estimates from the regression analysis (generations 10 and 11 considered jointly) are reported for each trait.
	Regression term	Stigma anther separation			Day of flower			Leaf width			Corolla width			Anther length			Corolla Length			Pistil lenth			Self-seed count			Outseed mass
		Estimate	SE	P-Value	Estimate	SE	P-Value	Estimate	SE	P-Value	Estimate	SE	P-Value	Estimate	SE	P-Value	Estimate	SE	P-Value	Estimate	SE	P-Value	Estimate	SE	P-Value	Estimate	SE	P-Value
	Ancestral mean	8.971	0.243	0	30.658	0.273	0	99.42	1.47	0	73.39	0.666	0	47.472	0.309	0	89.271	0.642	0	56.374	0.361	0	0.7067	0.0493	0	0.8379	0.0177	0
	Deviations from ancestral mean
	Outbred mean population 1	-3.536	0.614	0	1.634	0.692	0.018	6.86	3.73	0.066	0.03	1.68	0.985	0.179	0.781	0.818	0.87	1.63	0.594	-3.368	0.915	0	0.562	0.121	0	-0.2099	0.0426	0
	Outbred mean population 2	-1.836	0.575	0.001	0.27	0.642	0.674	-10.7	3.46	0.002	-0.34	1.56	0.826	-2.03	0.731	0.006	-2.36	1.51	0.118	-4.046	0.849	0	0.649	0.113	0	0.0473	0.0404	0.242
	Outbred mean population 3	-2.07	0.686	0.003	0.127	0.774	0.869	-8.26	4.17	0.048	-13.76	1.88	0	-2.623	0.873	0.003	-6.9	1.82	0	-4.7	1.02	0	0.588	0.135	0	-0.1564	0.0493	0.002
	Outbred mean population 4	-2.094	0.686	0.002	-3.183	0.773	0	-23	4.17	0	-8.87	1.88	0	3.287	0.872	0	0.17	1.82	0.925	1.18	1.02	0.248	0.528	0.141	0	0.0287	0.05	0.566
	Outbred mean population 5	1.344	0.376	0	-4.952	0.422	0	-27.84	2.28	0	-4.7	1.03	0	-1.827	0.478	0	-5.118	0.995	0	-0.535	0.558	0.338	0.1535	0.0759	0.043	0.0204	0.0269	0.448
	Outbred mean population 6	-3.742	0.635	0	-2.889	0.715	0	-16.74	3.86	0	-8.74	1.74	0	-0.481	0.807	0.552	-4.55	1.68	0.007	-4.234	0.946	0	0.476	0.127	0	-0.1104	0.045	0.014
	Outbred mean population 7	-2.102	0.559	0	-3.763	0.63	0	-20.44	3.4	0	-9.37	1.53	0	-0.734	0.711	0.302	-6.17	1.48	0	-2.847	0.833	0.001	0.615	0.111	0	-0.0781	0.0397	0.049
	Outbred mean population 8	-1.895	0.614	0.002	-2.417	0.692	0	-14.14	3.73	0	-6.37	1.68	0	1.782	0.781	0.023	-1.51	1.64	0.358	-0.125	0.915	0.892	0.597	0.122	0	0.0698	0.0435	0.109
	Outbred mean population 9	-1.27	0.392	0.001	-6.026	0.439	0	-36.47	2.37	0	-6.28	1.08	0	-0.425	0.497	0.392	-5.73	1.03	0	-1.673	0.584	0.004	0.0745	0.079	0.346	-0.0361	0.0282	0.201
	Outbred mean population 10	-1.416	0.559	0.011	-3.301	0.63	0	-19.88	3.4	0	-7.12	1.53	0	-1.844	0.711	0.01	-3.51	1.48	0.018	-3.272	0.833	0	0.397	0.111	0	-0.0379	0.0397	0.339
	Outbred mean population 11	-2.701	0.718	0	3.314	0.809	0	-3.78	4.3	0.379	-6.27	1.94	0.001	0.256	0.899	0.776	-4.28	1.87	0.022	-2.38	1.07	0.026	0.495	0.139	0	-0.1123	0.05	0.025
	Outbred mean population 12	-1.381	0.707	0.051	-3.866	0.785	0	-9.37	4.3	0.03	-2.89	1.94	0.137	1.98	0.9	0.028	3.7	1.87	0.048	0.59	1.05	0.577	0.41	0.142	0.004	0.0508	0.0501	0.311
	Outbred mean population 13	-0.325	0.621	0.601	-5.356	0.7	0	-12.12	3.78	0.001	-4.66	1.7	0.006	0.077	0.79	0.923	-1.99	1.64	0.226	-0.259	0.925	0.779	0.488	0.124	0	-0.0378	0.044	0.391
	Outbred mean population 14	-2.455	0.607	0	-0.558	0.684	0.415	17.25	3.69	0	6.25	1.67	0	-0.266	0.772	0.73	2.26	1.61	0.159	-2.732	0.904	0.003	0.709	0.121	0	0.1427	0.0435	0.001
	Outbred mean population 15	-1.589	0.636	0.013	1.47	0.717	0.041	-2.21	3.87	0.567	-13.76	1.75	0	-1.729	0.809	0.033	-6.33	1.68	0	-3.329	0.948	0	0.834	0.127	0	-0.1063	0.0457	0.02
	Outbred mean population 16	-1.023	0.598	0.087	-2.655	0.68	0	-20.33	3.67	0	-1.15	1.64	0.482	-1.132	0.76	0.137	0.02	1.58	0.991	-2.167	0.891	0.015	0.65	0.117	0	-0.015	0.042	0.722
	Outbred mean population 17	1.151	0.388	0.003	-6.053	0.436	0	-31.76	2.35	0	-4.39	1.06	0	-1.961	0.492	0	-5.63	1.03	0	-0.769	0.579	0.184	-0.0303	0.0798	0.704	-0.0649	0.0281	0.021
	Outbred mean population 18	-3.387	0.556	0	-1.895	0.621	0.002	-13.08	3.35	0	-3.17	1.52	0.038	-1.362	0.706	0.054	-4.73	1.47	0.001	-4.76	0.828	0	0.6	0.109	0	-0.0763	0.0394	0.053
	Outbred mean population 19	-1.54	0.602	0.011	-2.808	0.678	0	-13.58	3.66	0	-3.88	1.65	0.019	-1.437	0.765	0.061	-1.61	1.59	0.311	-2.988	0.896	0.001	1.074	0.118	0	-0.032	0.0427	0.453
	Outbred mean population 20	-0.434	0.389	0.264	-5.536	0.438	0	-32.65	2.36	0	-8.53	1.07	0	-1.185	0.494	0.016	-5.05	1.03	0	-1.607	0.579	0.006	-0.1482	0.0781	0.058	-0.1292	0.0281	0
	Effect of inbreeding population 1	-0.094	0.699	0.893	-0.799	0.788	0.311	-20.17	4.25	0	-7.49	1.92	0	-2.932	0.889	0.001	-7.61	1.86	0	-2.98	1.04	0.004	-0.186	0.139	0.181	0.0577	0.0494	0.243
	Effect of inbreeding population 2	-0.435	0.66	0.51	-1.488	0.739	0.044	-9.36	3.99	0.019	-8.08	1.8	0	-2.865	0.839	0.001	-6.88	1.74	0	-3.089	0.977	0.002	-0.426	0.13	0.001	-0.1711	0.0474	0
	Effect of inbreeding population 3	-0.615	0.772	0.426	-0.753	0.871	0.387	-6.88	4.7	0.143	-4.83	2.12	0.023	-1.89	0.982	0.054	-4.79	2.04	0.019	-2.47	1.15	0.032	-0.662	0.154	0	-0.0269	0.0559	0.63
	Effect of inbreeding population 4	0.891	0.762	0.243	0.885	0.859	0.303	2.82	4.64	0.544	-3.09	2.09	0.139	-1.942	0.969	0.045	-2.9	2.02	0.15	-1.01	1.14	0.373	-0.562	0.157	0	-0.1229	0.056	0.028
	Effect of inbreeding population 6	0.382	0.727	0.6	-0.403	0.818	0.622	-2.91	4.41	0.51	0.86	1.99	0.664	-0.517	0.923	0.575	-0.91	1.92	0.636	-0.02	1.08	0.987	-0.335	0.145	0.021	0.0375	0.0518	0.469
	Effect of inbreeding population 7	0.916	0.648	0.157	1.026	0.727	0.158	-6.52	3.93	0.097	-0.34	1.77	0.847	-2.334	0.824	0.005	-2.89	1.71	0.091	-1.565	0.961	0.104	-0.447	0.129	0.001	-0.1827	0.0465	0
	Effect of inbreeding population 8	1.834	0.699	0.009	-0.496	0.788	0.529	-14.16	4.25	0.001	-3.53	1.92	0.066	-3.136	0.889	0	-4.89	1.87	0.009	-1.26	1.04	0.226	-0.568	0.14	0	-0.1131	0.0494	0.022
	Effect of inbreeding population 10	-0.439	0.649	0.499	0.839	0.731	0.251	3.67	3.94	0.351	-0.39	1.79	0.828	-0.912	0.826	0.27	-2.03	1.72	0.238	-1.371	0.966	0.156	-0.308	0.13	0.017	-0.0402	0.046	0.383
	Effect of inbreeding population 11	-0.326	0.807	0.686	-4.131	0.905	0	-8.53	4.83	0.078	-5.83	2.18	0.008	-1.97	1.01	0.051	-5.57	2.1	0.008	-2.28	1.2	0.058	-0.145	0.158	0.36	-0.1511	0.0567	0.008
	Effect of inbreeding population 12	0.365	0.782	0.64	0.453	0.871	0.603	-12.15	4.76	0.011	-5.27	2.15	0.014	-1.589	0.994	0.11	-4.64	2.07	0.025	-1.31	1.16	0.258	-0.446	0.156	0.004	-0.2258	0.0556	0
	Effect of inbreeding population 13	-0.951	0.71	0.181	3.21	0.797	0	-7.03	4.31	0.103	-6.15	1.94	0.002	-2.576	0.899	0.004	-5.49	1.88	0.004	-3.34	1.06	0.002	-0.682	0.146	0	-0.1151	0.0507	0.023
	Effect of inbreeding population 14	0.153	0.689	0.824	-0.389	0.775	0.616	-12.23	4.19	0.004	-7.16	1.89	0	-2.576	0.875	0.003	-6.43	1.82	0	-2.45	1.03	0.017	-0.59	0.138	0	-0.1547	0.0502	0.002
	Effect of inbreeding population 15	-0.211	0.716	0.768	-2.759	0.807	0.001	-19.49	4.36	0	-4.82	1.96	0.014	-3.331	0.911	0	-6.01	1.9	0.002	-3.5	1.07	0.001	-0.526	0.145	0	-0.1345	0.0518	0.009
	Effect of inbreeding population 16	0.532	0.685	0.437	0.1	0.778	0.897	1.32	4.2	0.753	-3.69	1.88	0.049	-1.309	0.871	0.133	-1.93	1.81	0.287	-0.74	1.02	0.471	-0.498	0.136	0	-0.0347	0.0492	0.481
	Effect of inbreeding population 18	-0.717	0.643	0.265	0.547	0.72	0.448	-10.95	3.88	0.005	-6.07	1.76	0.001	-2.478	0.815	0.002	-4.46	1.7	0.009	-3.174	0.958	0.001	-0.544	0.127	0	-0.0288	0.046	0.531
	Effect of inbreeding population 19	-0.29	0.684	0.672	0.71	0.773	0.359	-14.46	4.16	0.001	-6.03	1.88	0.001	-3.275	0.87	0	-7.19	1.81	0	-3.52	1.02	0.001	-0.87	0.142	0	-0.1904	0.0494	0
